# Supplementary material
Source: publisher figshare collection journal article supplement (https://tandf.figshare.com/ndownloader/files/13899830)
Supplement: Supplementary file 1 [file 13899830]

## Supporting information

### New dammarane-type triterpenoid glycosides from *Gynostemma burmanicum*

Than Thi Kieu My<sup>a</sup>, Pham Thanh Ky<sup>a</sup>, Pham Thanh Binh<sup>b</sup>, Nguyen Phuong Thao<sup>b</sup> and  
Nguyen Tien Dat<sup>c,\*</sup>

<sup>a</sup>Department of Pharmacognosy, Hanoi University of Pharmacy, 13-15 Le Thanh Tong, Hanoi, Vietnam; <sup>b</sup>Institute of Marine Biochemistry, Vietnam Academy of Science and Technology (VAST), 18-Hoang Quoc Viet, Cau Giay, Hanoi, Vietnam; <sup>c</sup>Center for Research and Technology Transfer, VAST, 18-Hoang Quoc Viet, Cau Giay, Hanoi, Vietnam

Corresponding author: Nguyen Tien Dat: [ngtiend@imbc.vast.vn](mailto:ngtiend@imbc.vast.vn)

#### ABSTRACT

The chemical composition of *Gynostemma burmanicum* King ex Chakrav. was investigated for the first time in this study. Nine dammarane glycosides (**1–9**) were isolated from the EtOH extract of the aerial parts of *G. burmanicum*. Their structures were elucidated by 1D and 2D NMR spectroscopic interpretation as well as by chemical studies. The new compounds were 3 $\beta$ ,20 $S$ -dihydroxydammar-24-ene-3-O- $\beta$ -D-glucopyranosyl-20-O-[ $\beta$ -D-xylopyranosyl-(1 $\rightarrow$ 6)- $\beta$ -D-glucopyranoside] (**1**), 3 $\beta$ ,12 $\beta$ ,20 $S$ -trihydroxydammar-24-ene-3-O- $\beta$ -D-xylopyranosyl-20-O-[ $\beta$ -D-xylopyranosyl-(1 $\rightarrow$ 6)- $\beta$ -D-glucopyranoside] (**2**), and 12-oxo-3 $\beta$ ,20 $S$ -dihydroxydammar-24-ene-3-O-[ $\beta$ -D-glucopyranosyl(1 $\rightarrow$ 2)- $\beta$ -D-glucopyranosyl]-20-O-[ $\beta$ -D-xylopyranosyl-(1 $\rightarrow$ 6)- $\beta$ -D-glucopyranoside] (**3**).

**KEYWORDS:** *Gynostemma burmanicum*, Cucurbitaceae, dammarane saponin

## Cotents

|                                                                                                                                        |  |
|----------------------------------------------------------------------------------------------------------------------------------------|--|
| <b>Figure S1.</b> $^1\text{H}$ NMR spectrum ( $\text{CD}_3\text{OD}$ , 500 MHz) of <b>1</b> .....                                      |  |
| <b>Figure S2.</b> $^{13}\text{C}$ NMR spectrum ( $\text{CD}_3\text{OD}$ , 125 MHz) of <b>1</b> .....                                   |  |
| <b>Figure S3.</b> COSY spectrum ( $\text{CD}_3\text{OD}$ , 500 MHz) of <b>1</b> .....                                                  |  |
| <b>Figure S4.</b> HMQC spectrum ( $\text{CD}_3\text{OD}$ , 500 MHz) of <b>1</b> .....                                                  |  |
| <b>Figure S5.</b> HMBC spectrum ( $\text{CD}_3\text{OD}$ , 500 MHz) of <b>1</b> .....                                                  |  |
| <b>Figure S6.</b> NOESY spectrum ( $\text{CD}_3\text{OD}$ , 500 MHz) of <b>1</b> .....                                                 |  |
| <b>Figure S7.</b> $^1\text{H}$ NMR spectrum ( $\text{CD}_3\text{OD}$ , 500 MHz) of <b>2</b> .....                                      |  |
| <b>Figure S8.</b> $^{13}\text{C}$ NMR spectrum ( $\text{CD}_3\text{OD}$ , 125 MHz) of <b>1</b> .....                                   |  |
| <b>Figure S9.</b> COSY spectrum ( $\text{CD}_3\text{OD}$ , 500 MHz) of <b>2</b> .....                                                  |  |
| <b>Figure S10.</b> HMQC spectrum ( $\text{CD}_3\text{OD}$ , 500 MHz) of <b>2</b> .....                                                 |  |
| <b>Figure S11.</b> HMBC spectrum ( $\text{CD}_3\text{OD}$ , 500 MHz) of <b>2</b> .....                                                 |  |
| <b>Figure S12.</b> NOESY spectrum ( $\text{CD}_3\text{OD}$ , 500 MHz) of <b>2</b> .....                                                |  |
| <b>Figure S13.</b> $^1\text{H}$ NMR spectrum ( $\text{CD}_3\text{OD}$ , 500 MHz) of <b>3</b> .....                                     |  |
| <b>Figure S14.</b> $^{13}\text{C}$ NMR spectrum ( $\text{CD}_3\text{OD}$ , 125 MHz) of <b>3</b> .....                                  |  |
| <b>Figure S15.</b> COSY spectrum ( $\text{CD}_3\text{OD}$ , 500 MHz) of <b>3</b> .....                                                 |  |
| <b>Figure S16.</b> HMQC spectrum ( $\text{CD}_3\text{OD}$ , 500 MHz) of <b>3</b> .....                                                 |  |
| <b>Figure S17.</b> HMBC spectrum ( $\text{CD}_3\text{OD}$ , 500 MHz) of <b>3</b> .....                                                 |  |
| <b>Figure S18.</b> Key HMBC ( $\rightarrow$ ) and COSY (—) of <b>1-3</b> and NOESY ( $\langle\cdots\rangle$ ) correlations of <b>2</b> |  |

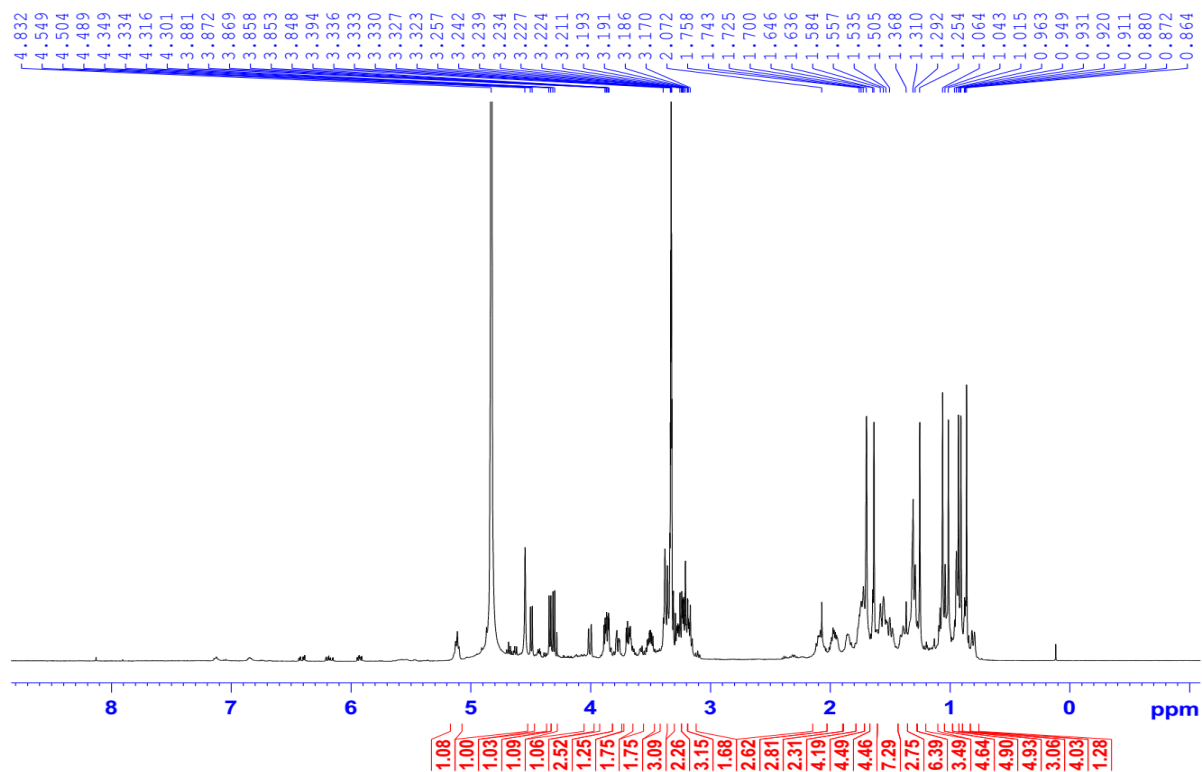

**Figure S1.**  $^1\text{H}$  NMR spectrum ( $\text{CD}_3\text{OD}$ , 500 MHz) of **1**.

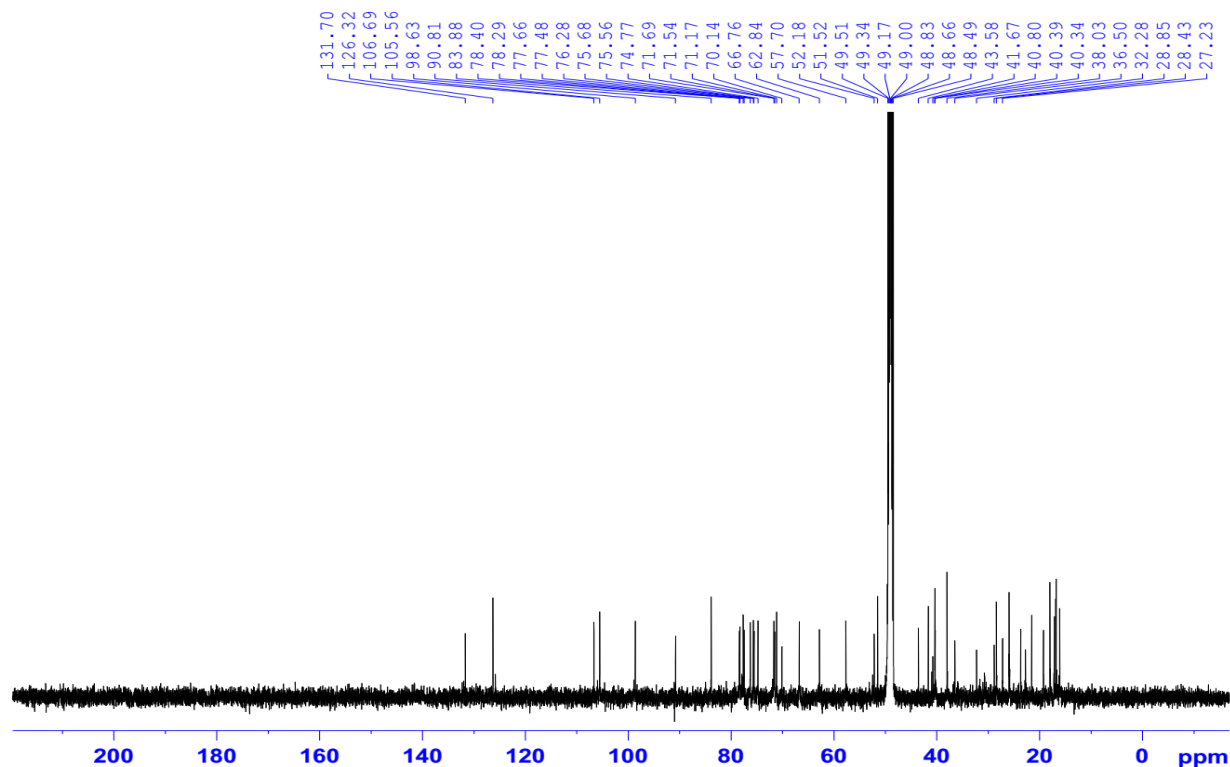

**Figure S2.**  $^{13}\text{C}$  NMR spectrum ( $\text{CD}_3\text{OD}$ , 125 MHz) of **1**.

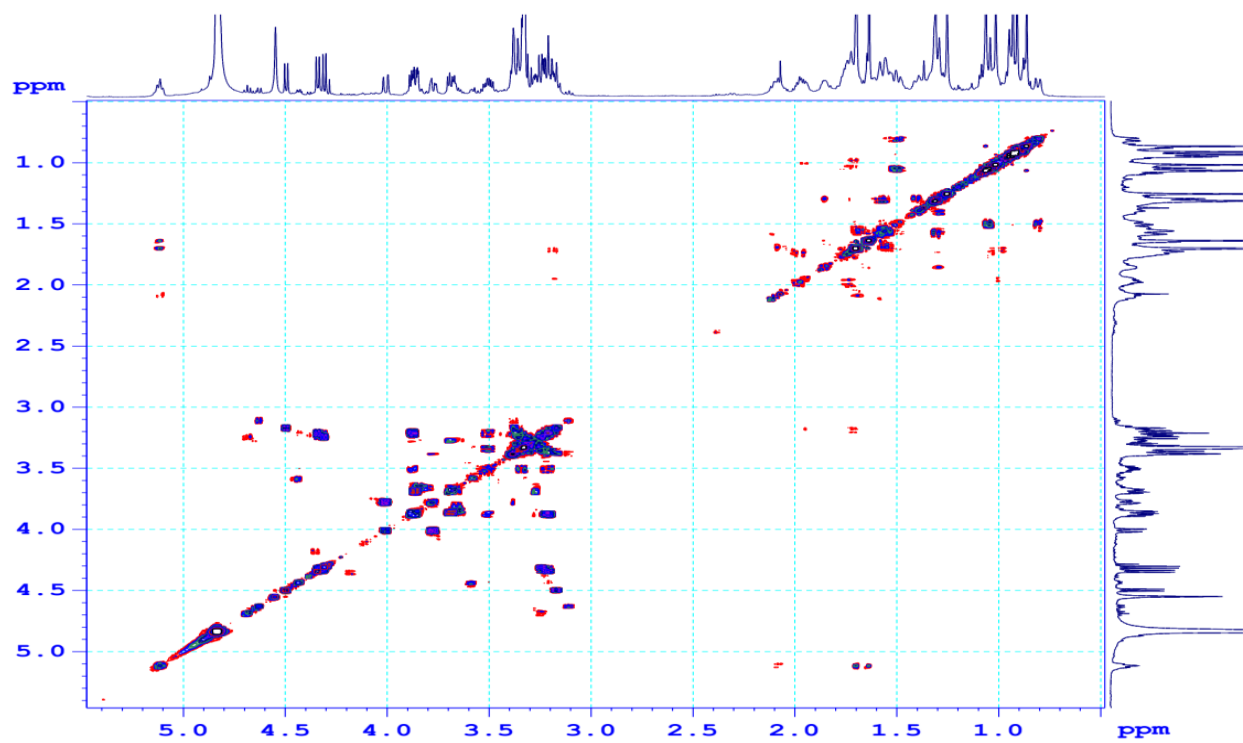

**Figure S3.** COSY spectrum ( $\text{CD}_3\text{OD}$ , 500 MHz) of **1**.

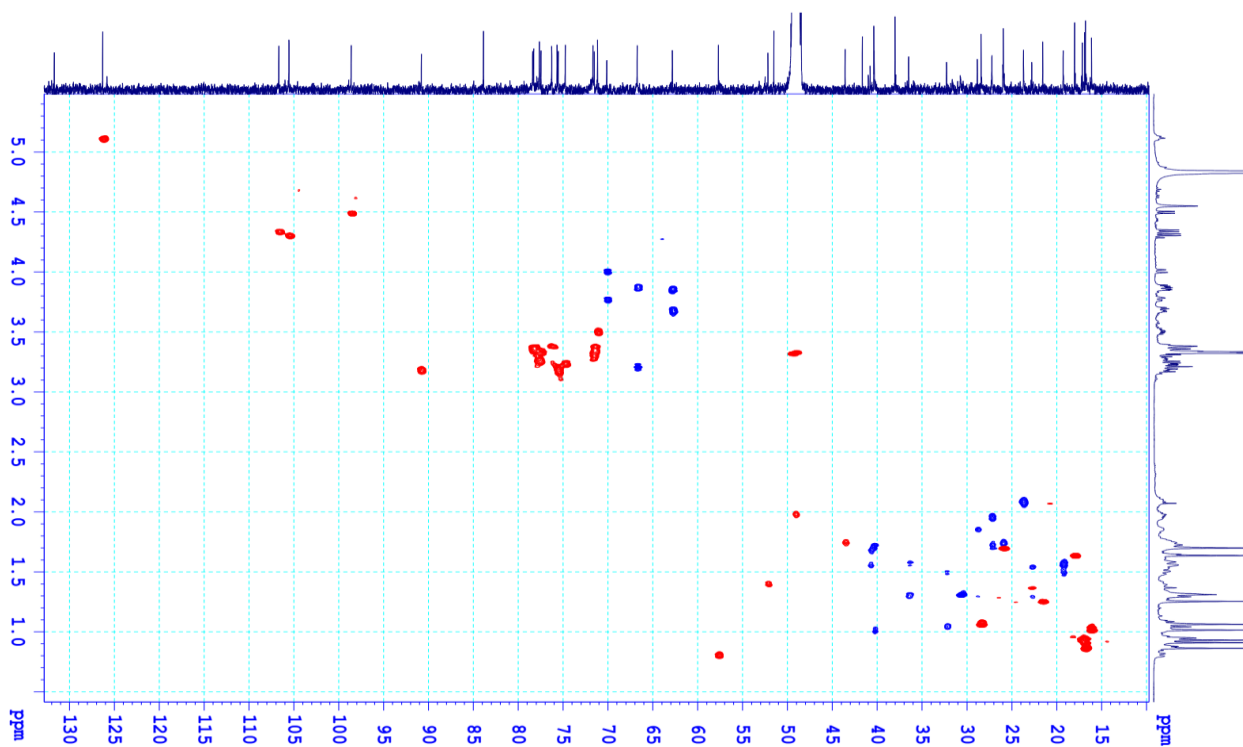

**Figure S4.** HMQC spectrum ( $\text{CD}_3\text{OD}$ , 500 MHz) of **1**.

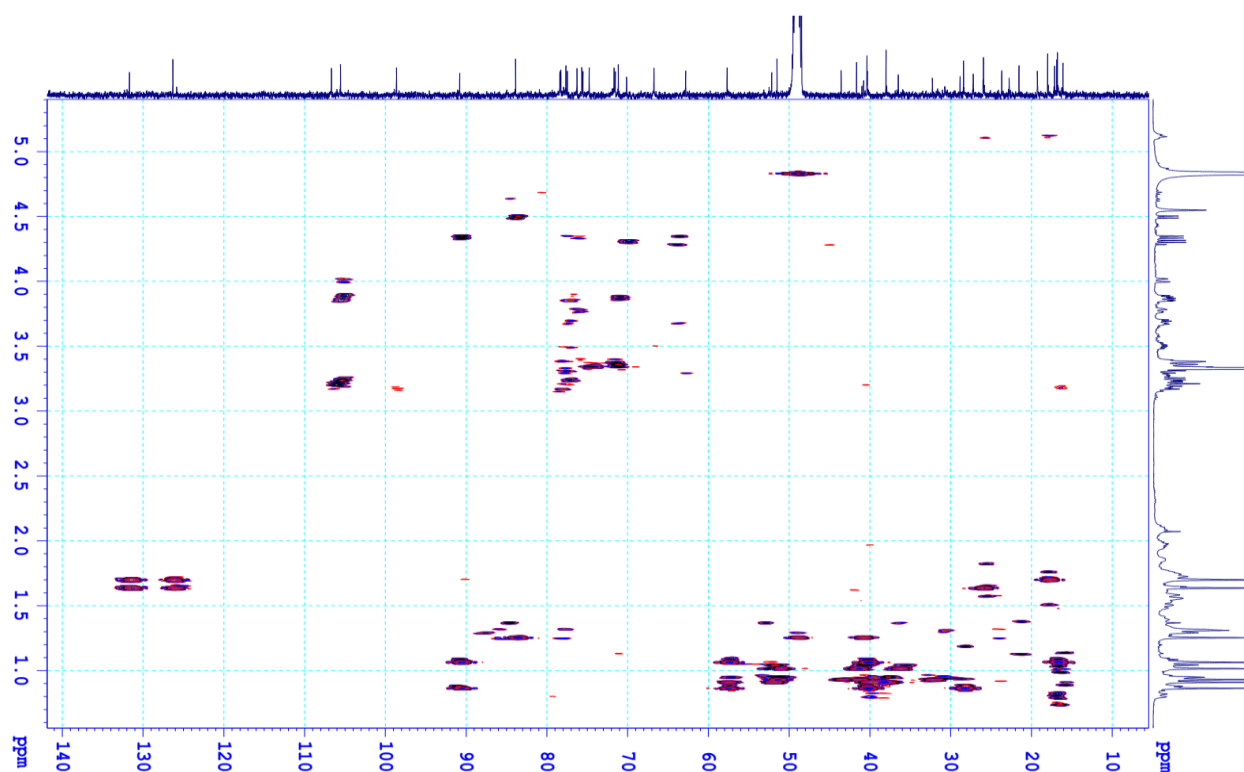

**Figure S5.** HMBC spectrum (CD<sub>3</sub>OD, 500 MHz) of **1**.

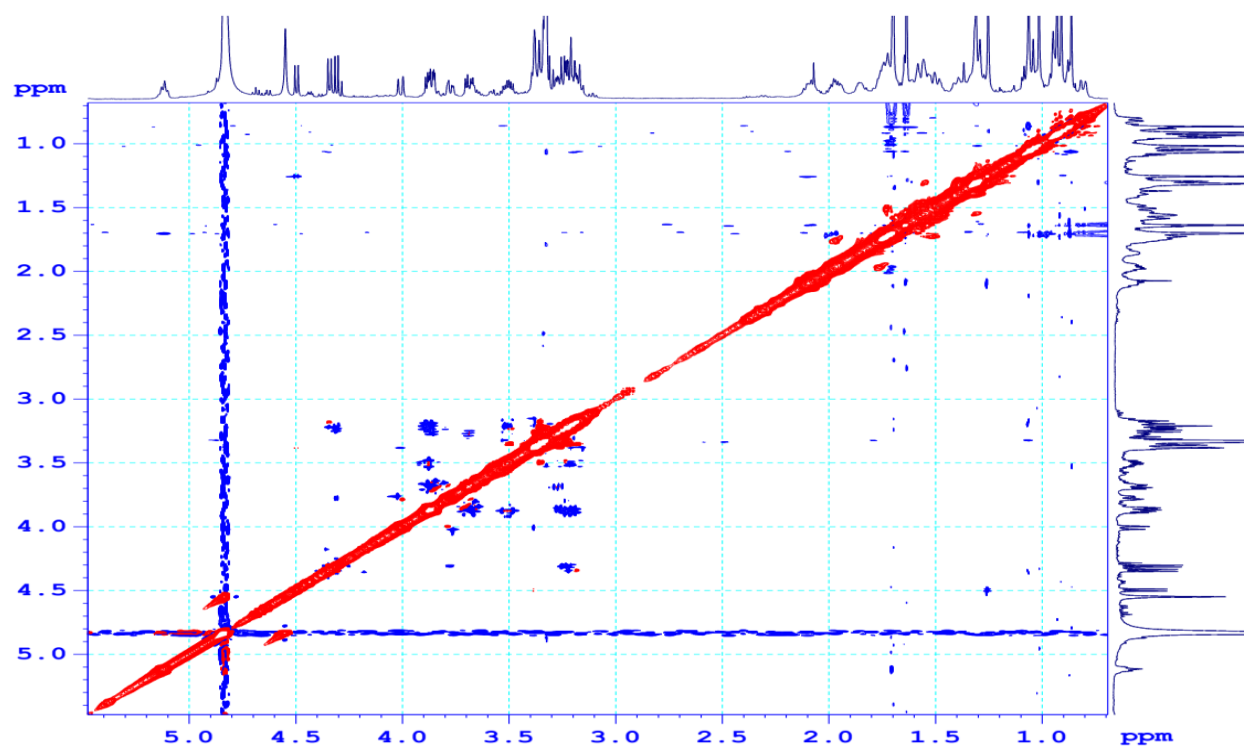

**Figure S6.** NOESY spectrum (CD<sub>3</sub>OD, 500 MHz) of **1**.

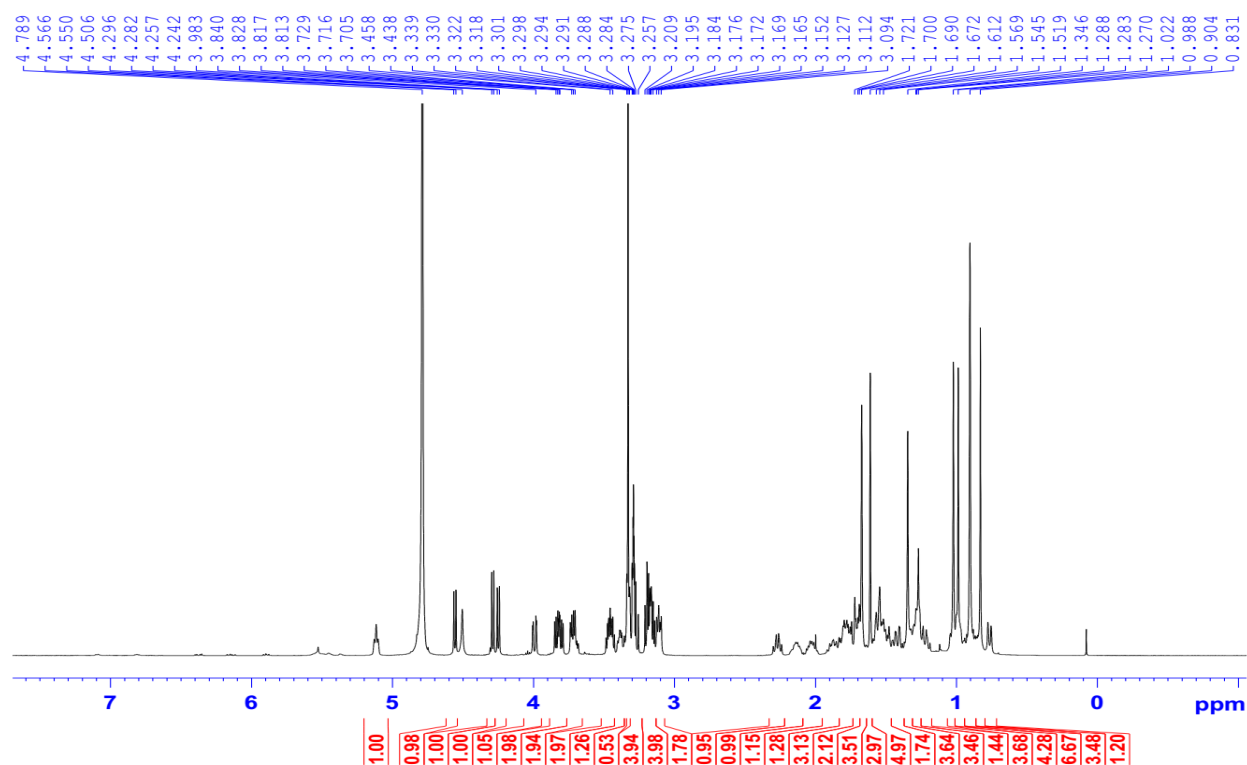

**Figure S7.**  $^1\text{H}$  NMR spectrum ( $\text{CD}_3\text{OD}$ , 500 MHz) of **2**.

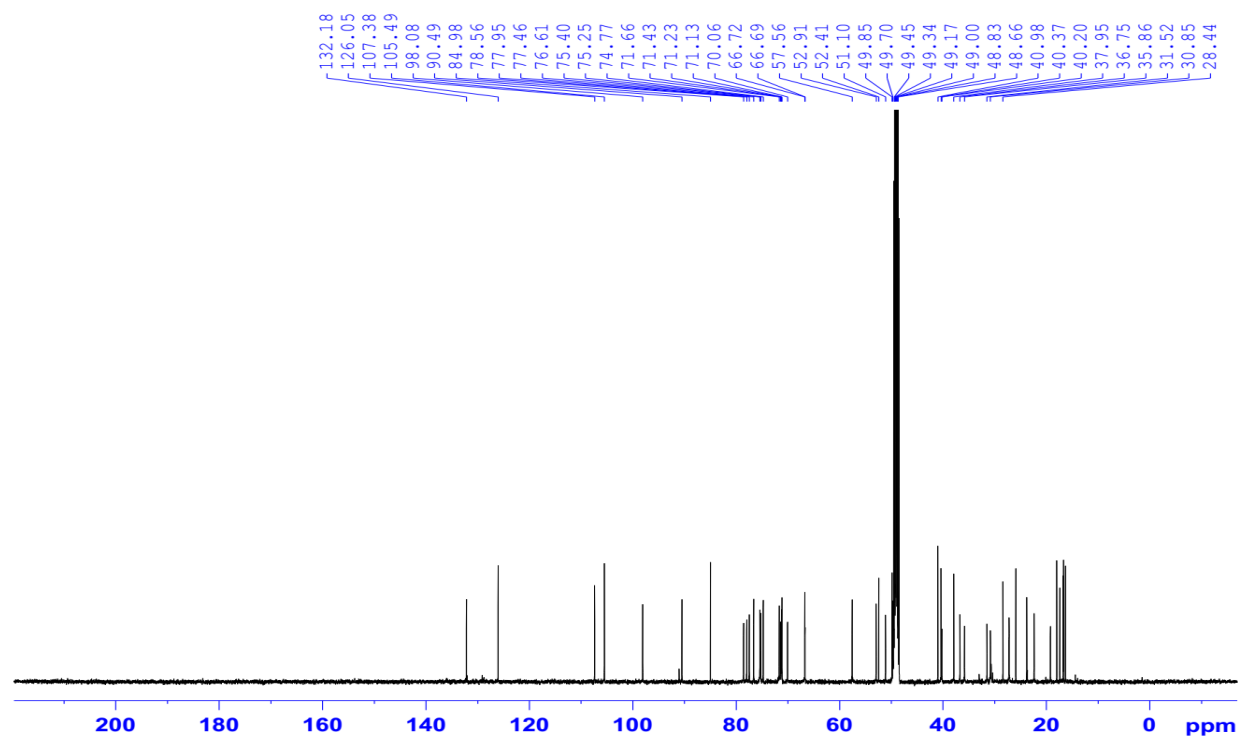

**Figure S8.**  $^{13}\text{C}$  NMR spectrum ( $\text{CD}_3\text{OD}$ , 125 MHz) of **1**.

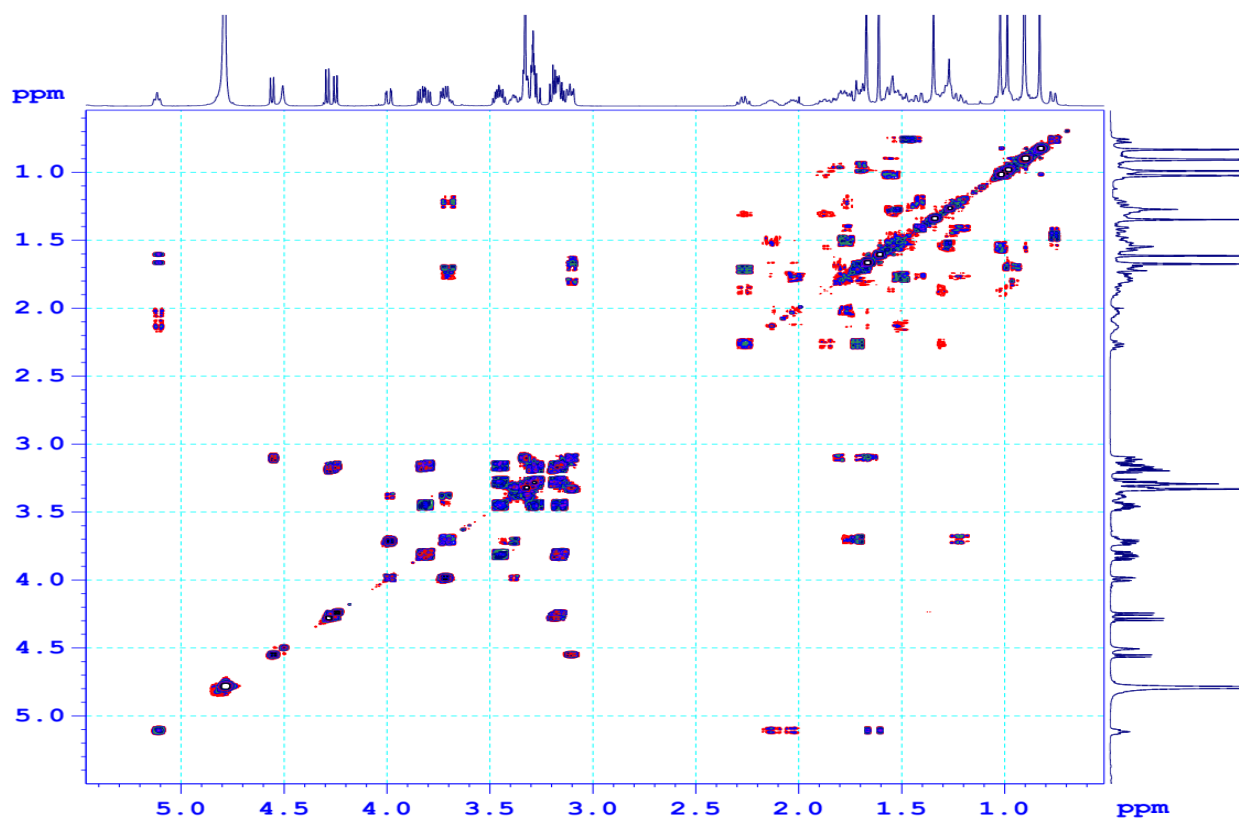

**Figure S9.** COSY spectrum ( $\text{CD}_3\text{OD}$ , 500 MHz) of **2**.

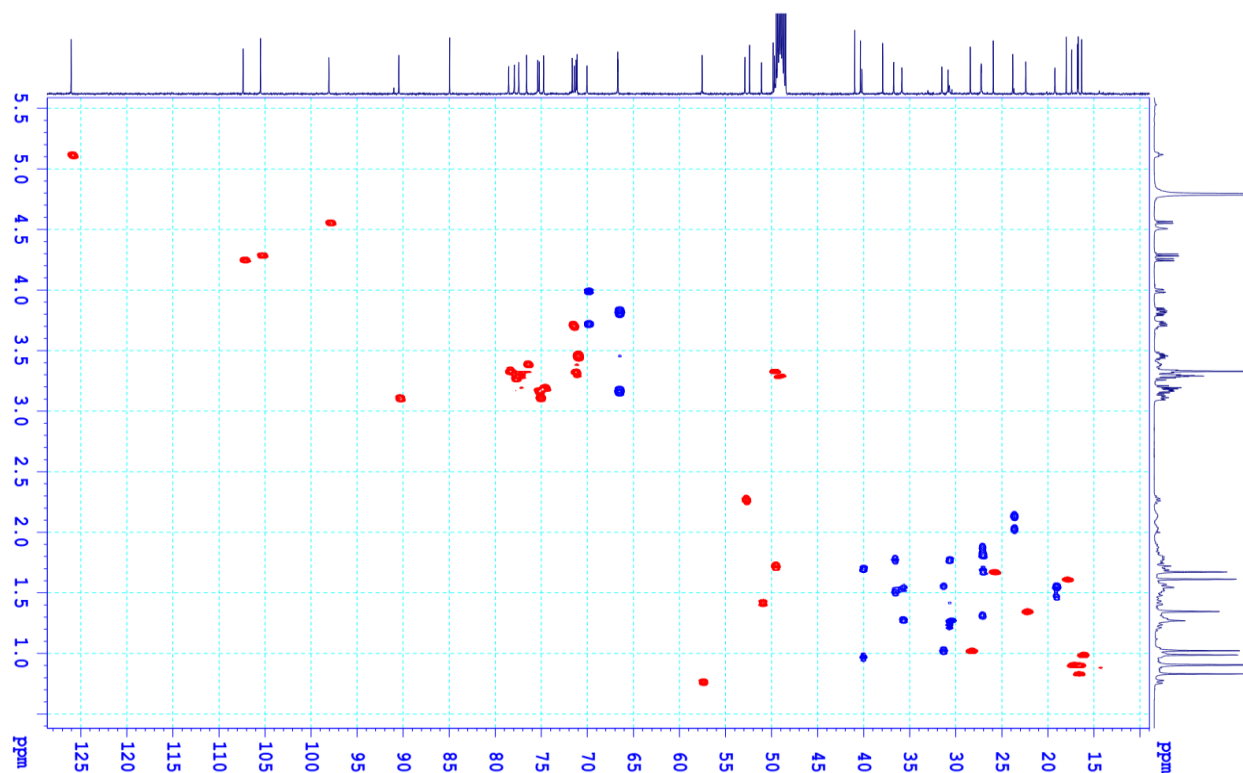

**Figure S10.** HMQC spectrum ( $\text{CD}_3\text{OD}$ , 500 MHz) of **2**.

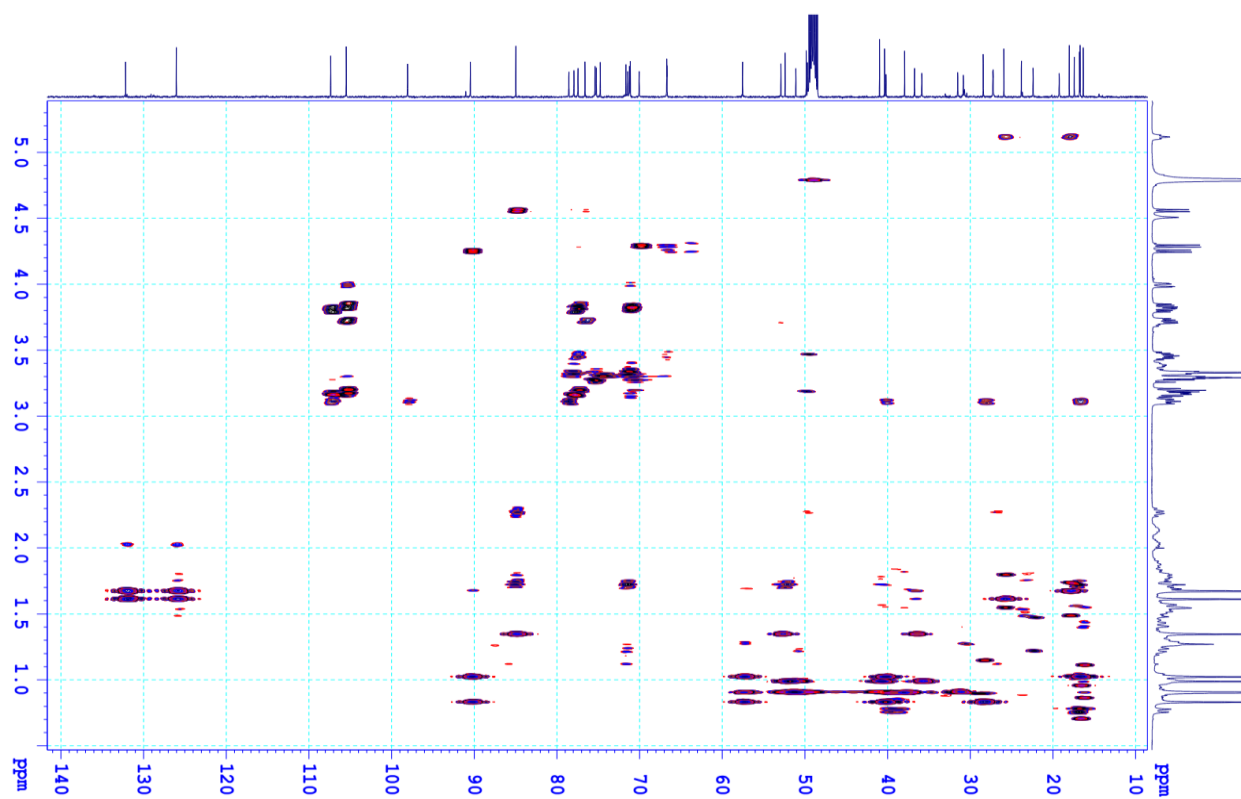

**Figure S11.** HMBC spectrum (CD<sub>3</sub>OD, 500 MHz) of **2**.

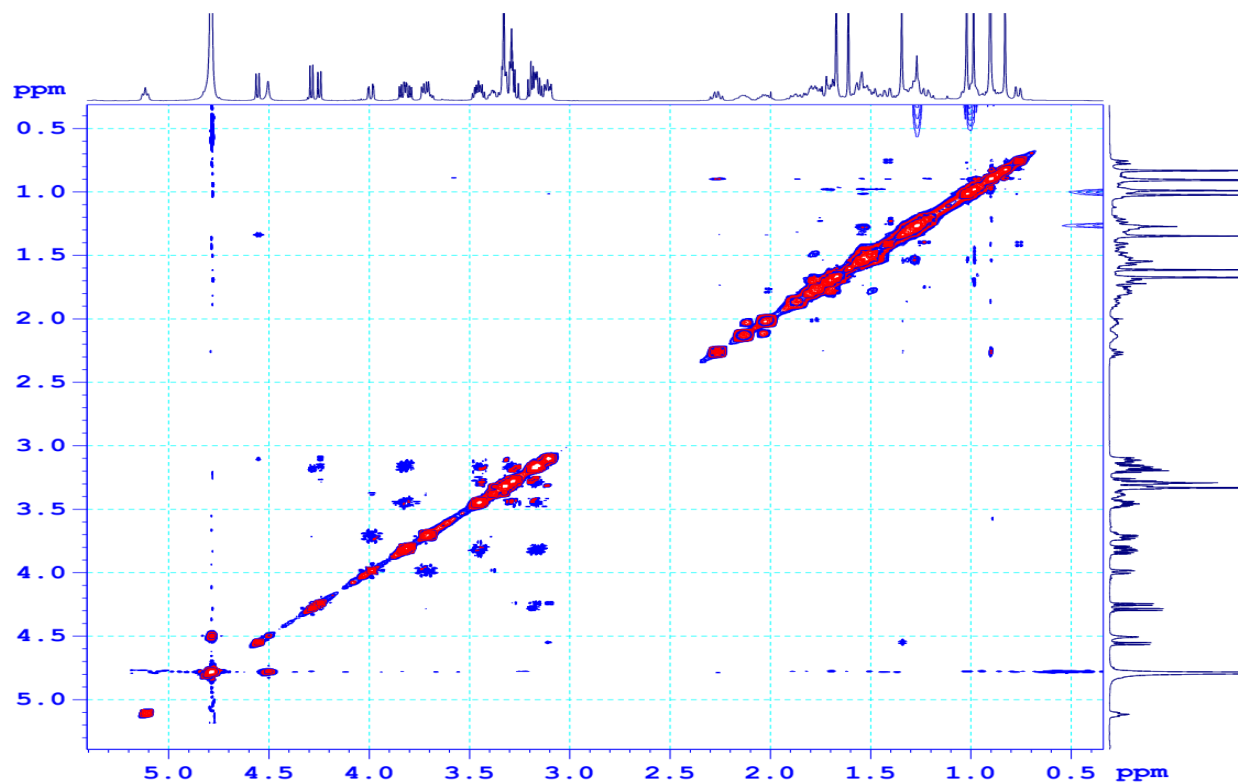

**Figure S12.** NOESY spectrum (CD<sub>3</sub>OD, 500 MHz) of **2**.



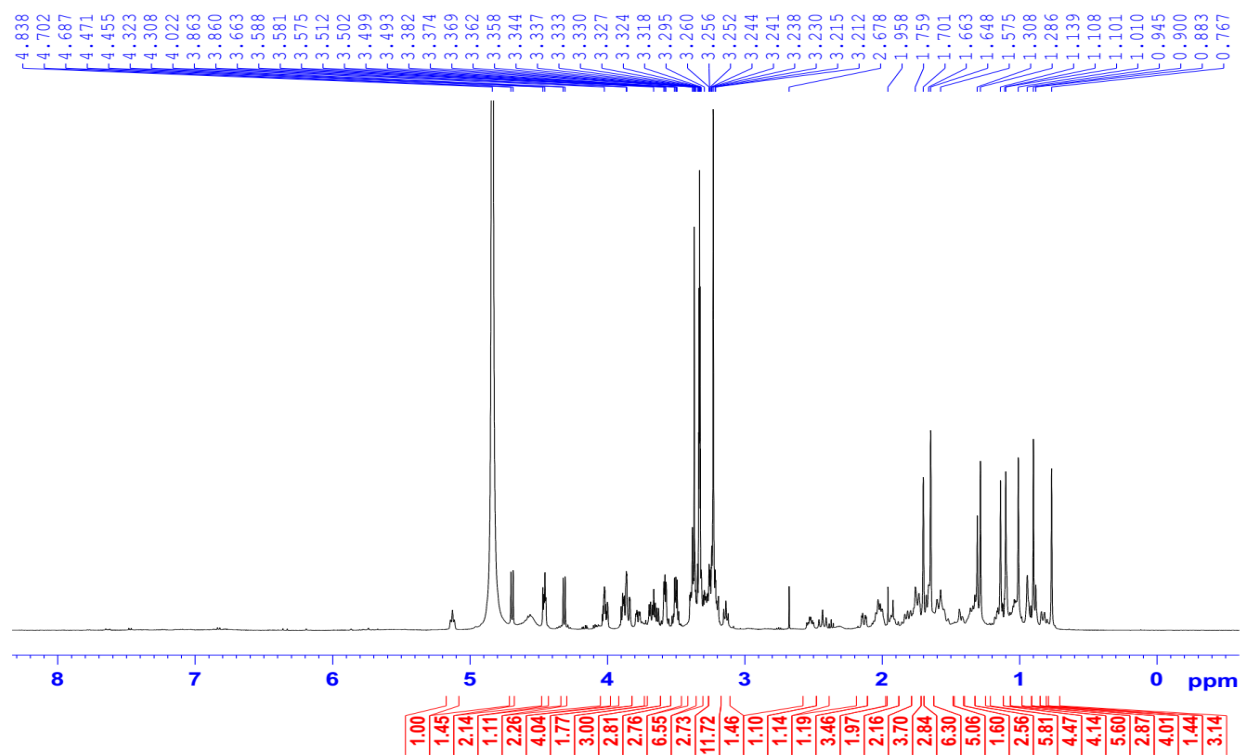

**Figure S13.** <sup>1</sup>H NMR spectrum (CD<sub>3</sub>OD, 500 MHz) of **3**.

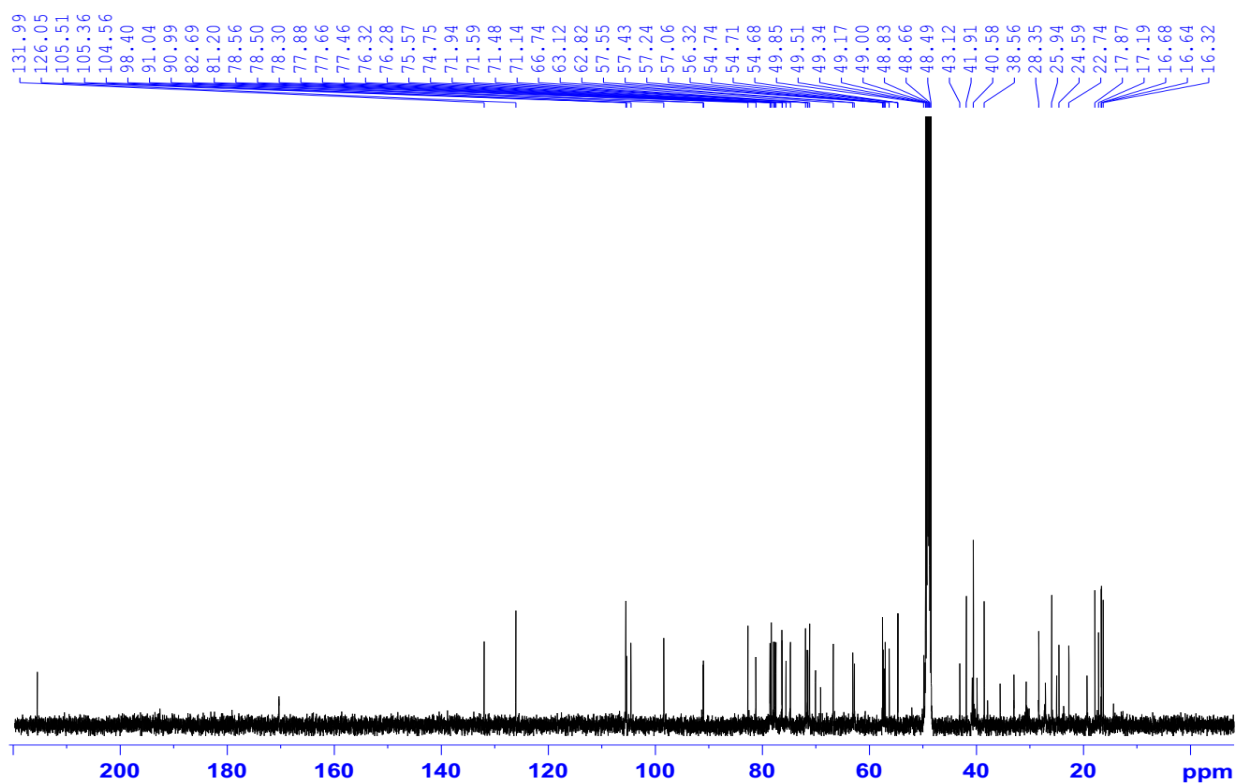

**Figure S14.** <sup>13</sup>C NMR spectrum (CD<sub>3</sub>OD, 125 MHz) of **3**.

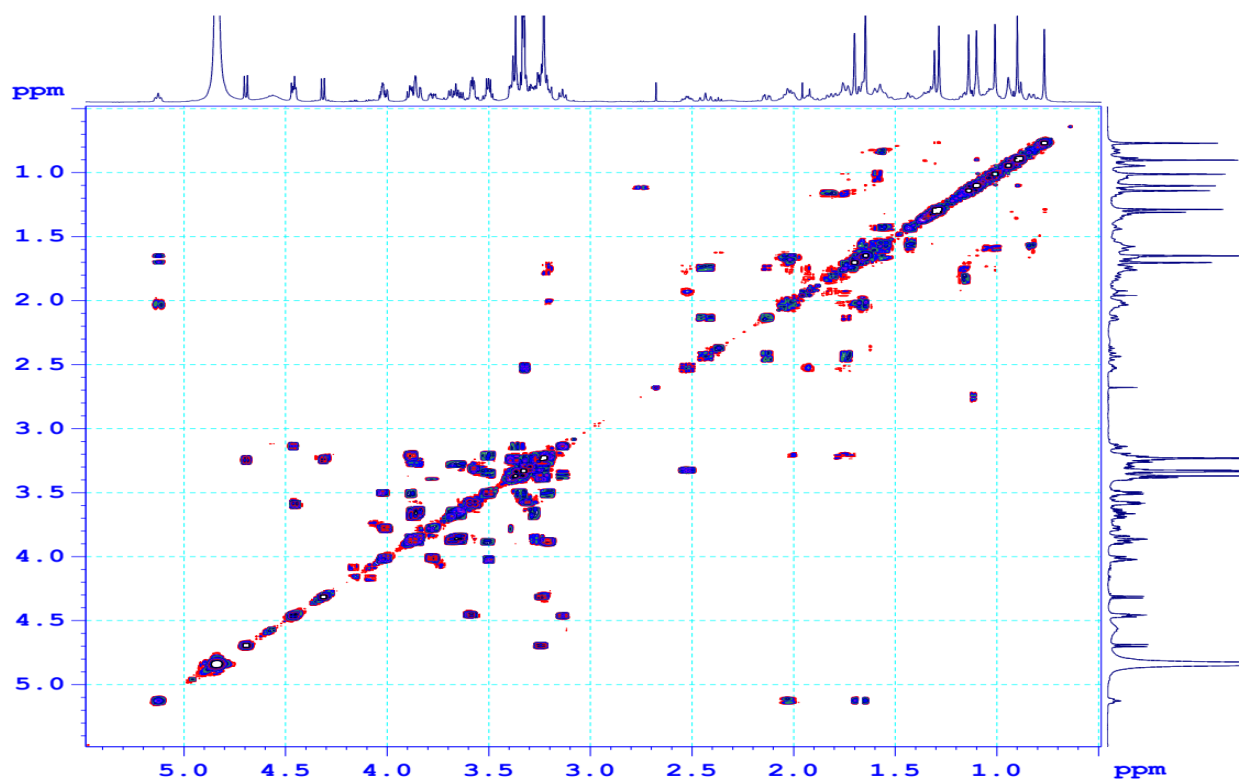

**Figure S15.** COSY spectrum (CD<sub>3</sub>OD, 500 MHz) of **3**.

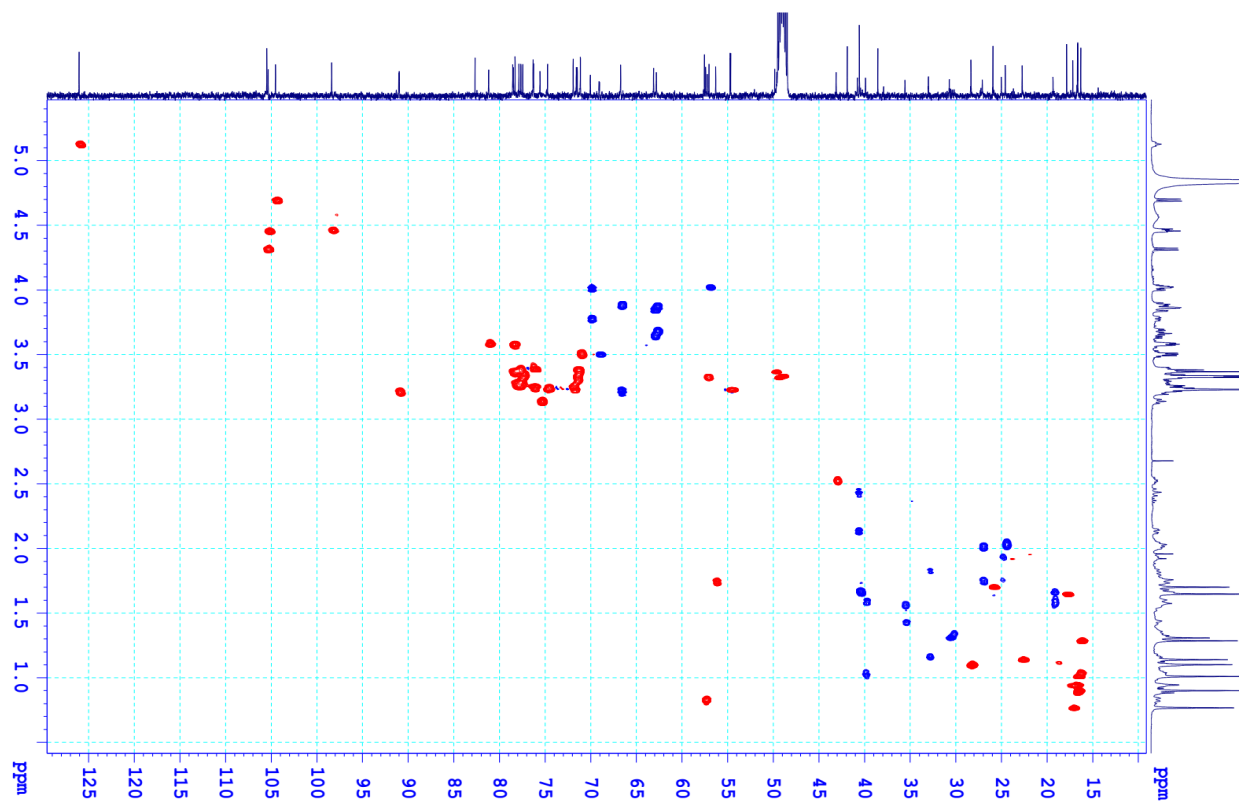

**Figure S16.** HMQC spectrum (CD<sub>3</sub>OD, 500 MHz) of **3**.

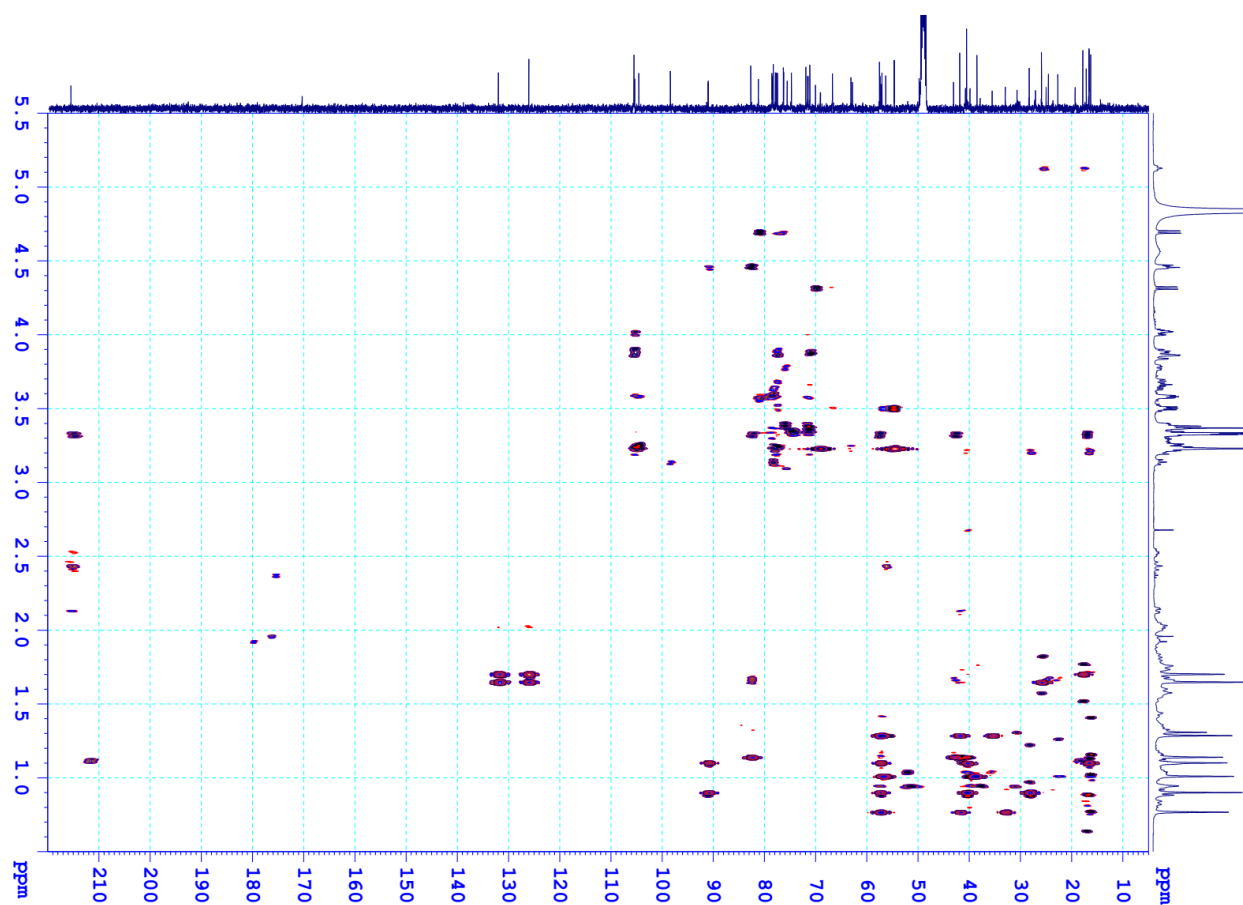

**Figure S17.** HMBC spectrum (CD<sub>3</sub>OD, 500 MHz) of **3**.

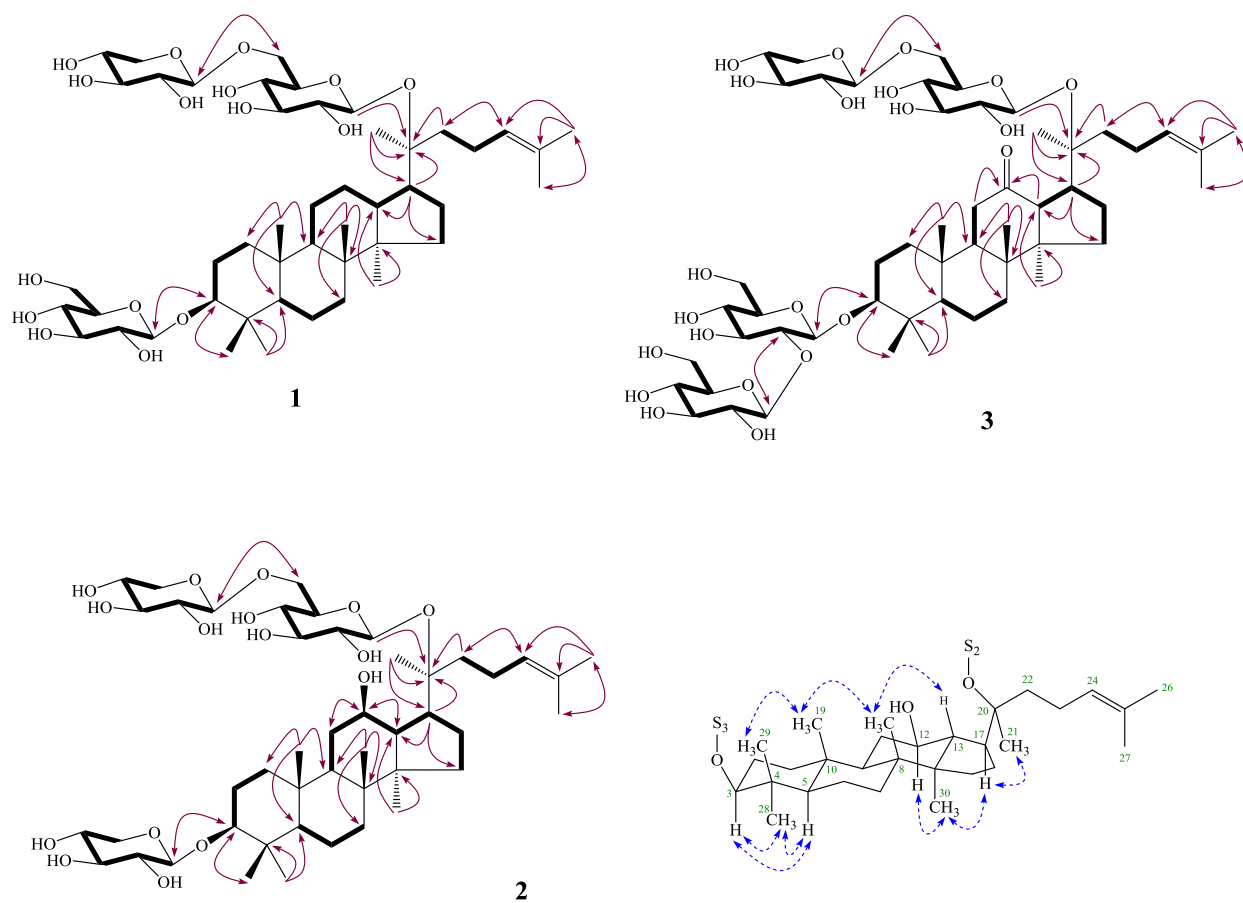

**Figure S18.** Key HMBC ( $\Rightarrow$ ) and COSY ( $\text{—}$ ) of **1-3** and NOESY ( $\text{---}$ ) correlations of **2**
